# Supplementary material
Source: PubMed Central journal article supplement (PMC7197377)
Supplement: NIHMS1527225-supplement-1.pdf [file NIHMS1527225-supplement-1.pdf]

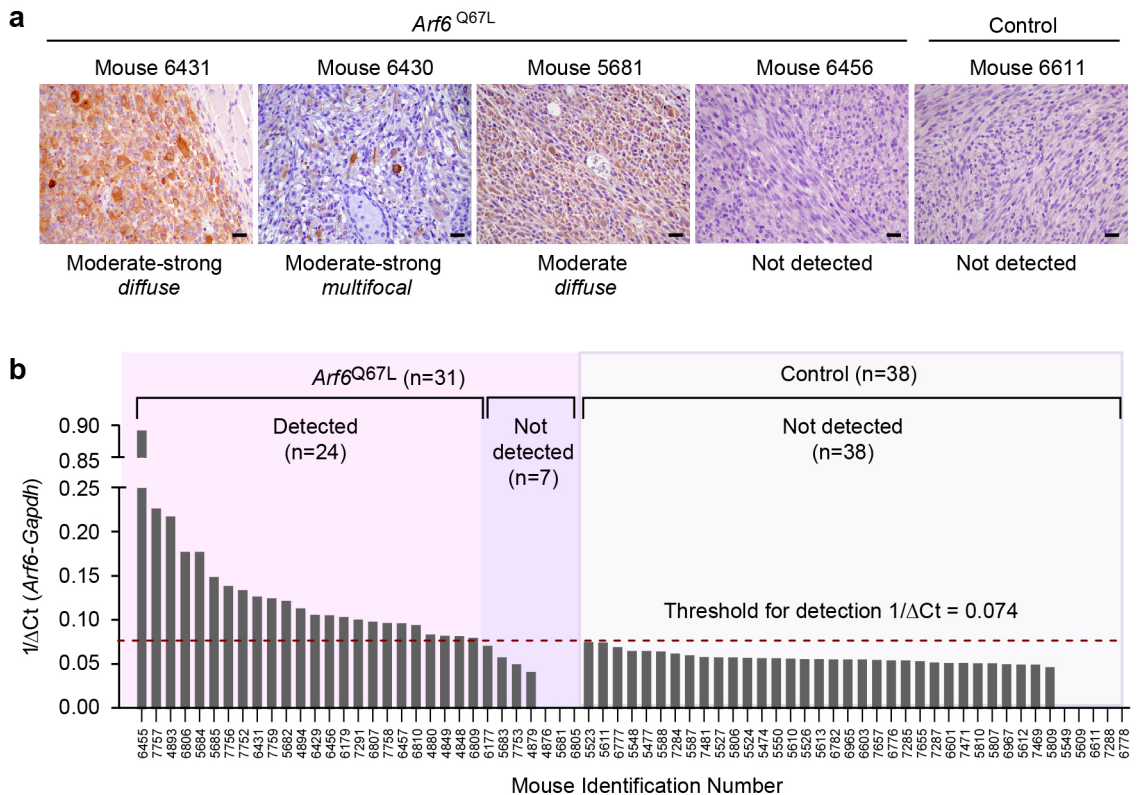

**Figure S1. Detection of HA-tagged ARF6<sup>Q67L</sup> in *Braf*<sup>CA</sup>;*Cdkn2a*<sup>ff</sup> melanoma.** a) Anti-HA immunostain of FFPE sections of primary tumors with variable levels of detection of ARF6<sup>Q67L</sup>-HA. The strongest staining was observed in tumors with the highest level of mRNA detected by qRT-PCR (b). Absent staining of FFPE tumors was observed in tumors with low (6456) and undetectable (6457) levels of mRNA by qRT-PCR of frozen tumors. Scale bars = 20 $\mu$ m, 400x magnification. Control = *Braf*<sup>CA</sup>;*Cdkn2a*<sup>ff</sup> (Cre-only injection). b) qRT-PCR of *Arf6*<sup>Q67L</sup>-HA from fresh, frozen primary tumor fragments. Bars represent the absolute difference in crossing threshold (Ct) between *Arf6*<sup>Q67L</sup>-HA and *Gapdh*. The Ct threshold that defines detection was established above the background signal for controls in both the *Braf*<sup>CA</sup>;*Cdkn2a*<sup>ff</sup> and the *Braf*<sup>CA</sup>;*Cdkn2a*<sup>ff</sup>;*Pten*<sup>ff</sup> cohorts (see Figures 1g and S3). With rare exception, positive tumors demonstrated *Arf6*<sup>Q67L</sup>-HA expression levels lower than *Gapdh*.
