# Supplementary material
Source: PubMed Central journal article supplement (PMC7197377)
Supplement: NIHMS1527225-supplement-3.pdf [file NIHMS1527225-supplement-3.pdf]

qRT-PCR detection of *Arf6*<sup>Q67L</sup>-HA expression in frozen tumors *Braf*<sup>CA</sup>;*Cdkn2a*<sup>ff</sup>;*Pten*<sup>ff</sup>

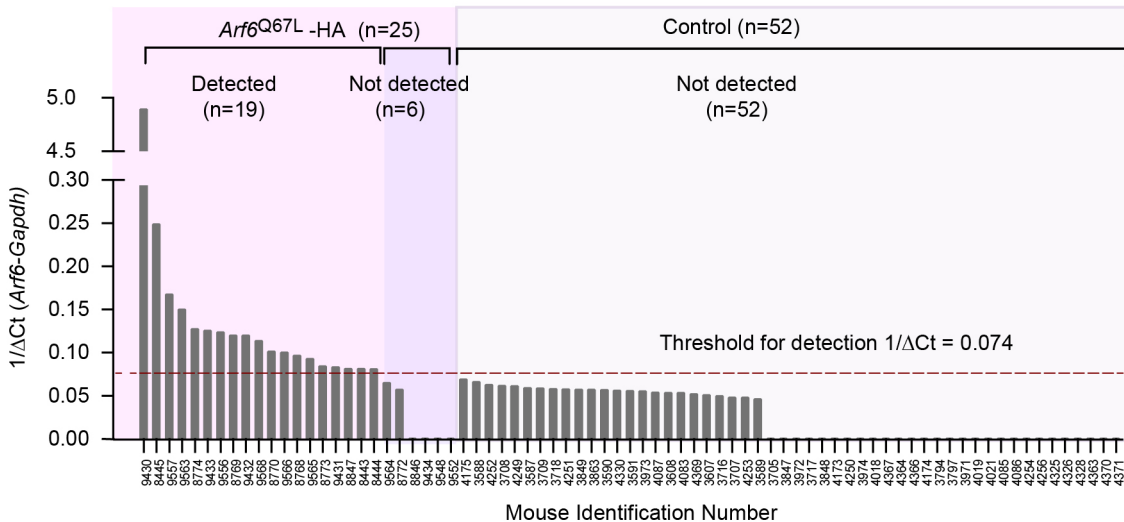

**Figure S3. *Arf6*<sup>Q67L</sup>-HA expression in tumors from *Braf*<sup>CA</sup>;*Cdkn2a*<sup>ff</sup>;*Pten*<sup>ff</sup> mice.** qRT-PCR detection of *Arf6*<sup>Q67L</sup>-HA from fresh, frozen primary tumor fragments. Bars represent the absolute difference in crossing threshold (Ct) between *Arf6*<sup>Q67L</sup>-HA and *Gapdh*. The Ct threshold that defines detection was established above the background signal for controls in both the *Braf*<sup>CA</sup>;*Cdkn2a*<sup>ff</sup> and the *Braf*<sup>CA</sup>;*Cdkn2a*<sup>ff</sup>;*Pten*<sup>ff</sup> cohorts (see also Figure S1). All mouse tumor negative by qRT-PCR showed detectable HA-tagged ARF6<sup>Q67L</sup> by immunohistochemistry (not shown, see Figure S1 for example).
