# Supplementary material
Source: PubMed Central journal article supplement (PMC7197377)
Supplement: NIHMS1527225-supplement-4.pdf [file NIHMS1527225-supplement-4.pdf]

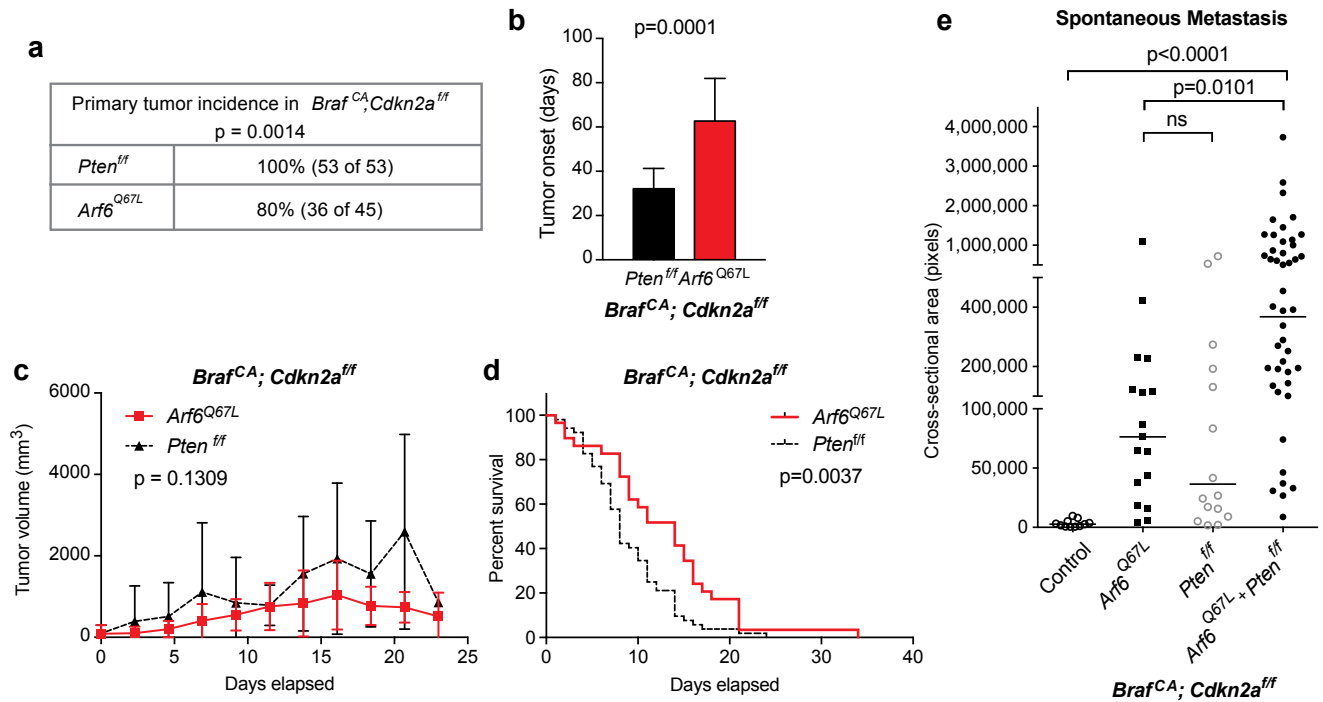

**Figure S4. Primary tumor incidence, growth, survival and metastasis in *Pten<sup>ff</sup>* vs. *Arf6<sup>Q67L</sup>* mice.**

(a) Increased tumor incidence (% = # of mice that developed a tumor / # TVA positive, injected mice) in *Pten<sup>ff</sup>* vs. *Arf6<sup>Q67L</sup>* cohorts. Fisher's exact test, two-tailed,  $\alpha < 0.05$ . (b) Primary tumor onset, unpaired t test with Welch's correction. (c) Primary tumor growth in *Pten<sup>ff</sup>* vs. *Arf6<sup>Q67L</sup>* mice upon tumor onset. Bars = SD. Two-way ANOVA,  $\alpha = 0.05$ . (d) Overall survival upon tumor onset, log-rank (Mantel-Cox) test. (e) Comparison of spontaneous metastatic volume in each mouse cohort (see also schematic, Figure 1g). ANOVA ( $p < 0.0001$ ) with Kruskal-Wallis multiple comparisons test (p values shown). ns=not significant. Identical data from the Control and *Arf6<sup>Q67L</sup>* cohorts are also shown in Figure 1c with a slightly different Y axis spacing.
