# Supplementary material
Source: PubMed Central journal article supplement (PMC7197377)
Supplement: NIHMS1527225-supplement-5.pdf [file NIHMS1527225-supplement-5.pdf]

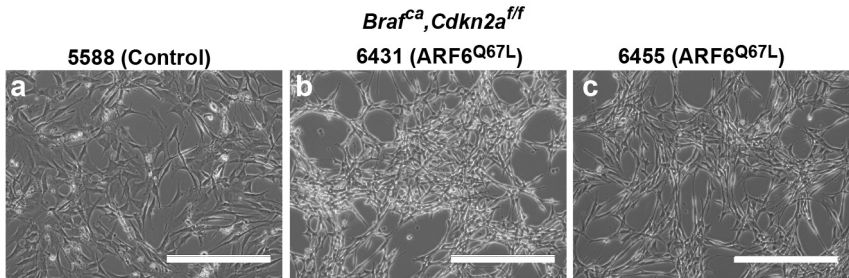

**Figure S5: ARF6-GTP induces morphologic changes in mouse melanoma cells.** Bright field images (100x magnification) of primary mouse melanoma cell lines derived from control *Braf<sup>CA</sup>;Cdkn2a<sup>f/f</sup>* (5588) or *Braf<sup>CA</sup>;Cdkn2a<sup>f/f</sup> + Arf6<sup>Q67L</sup>* (6431, 6455) mice. ARF6-GTP induces elongation/spindling of tumor cells relative to the more polygonal-shaped controls. Scale bars = 400μm.
