# Supplementary material
Source: PubMed Central journal article supplement (PMC7197377)
Supplement: NIHMS1527225-supplement-6.pdf [file NIHMS1527225-supplement-6.pdf]

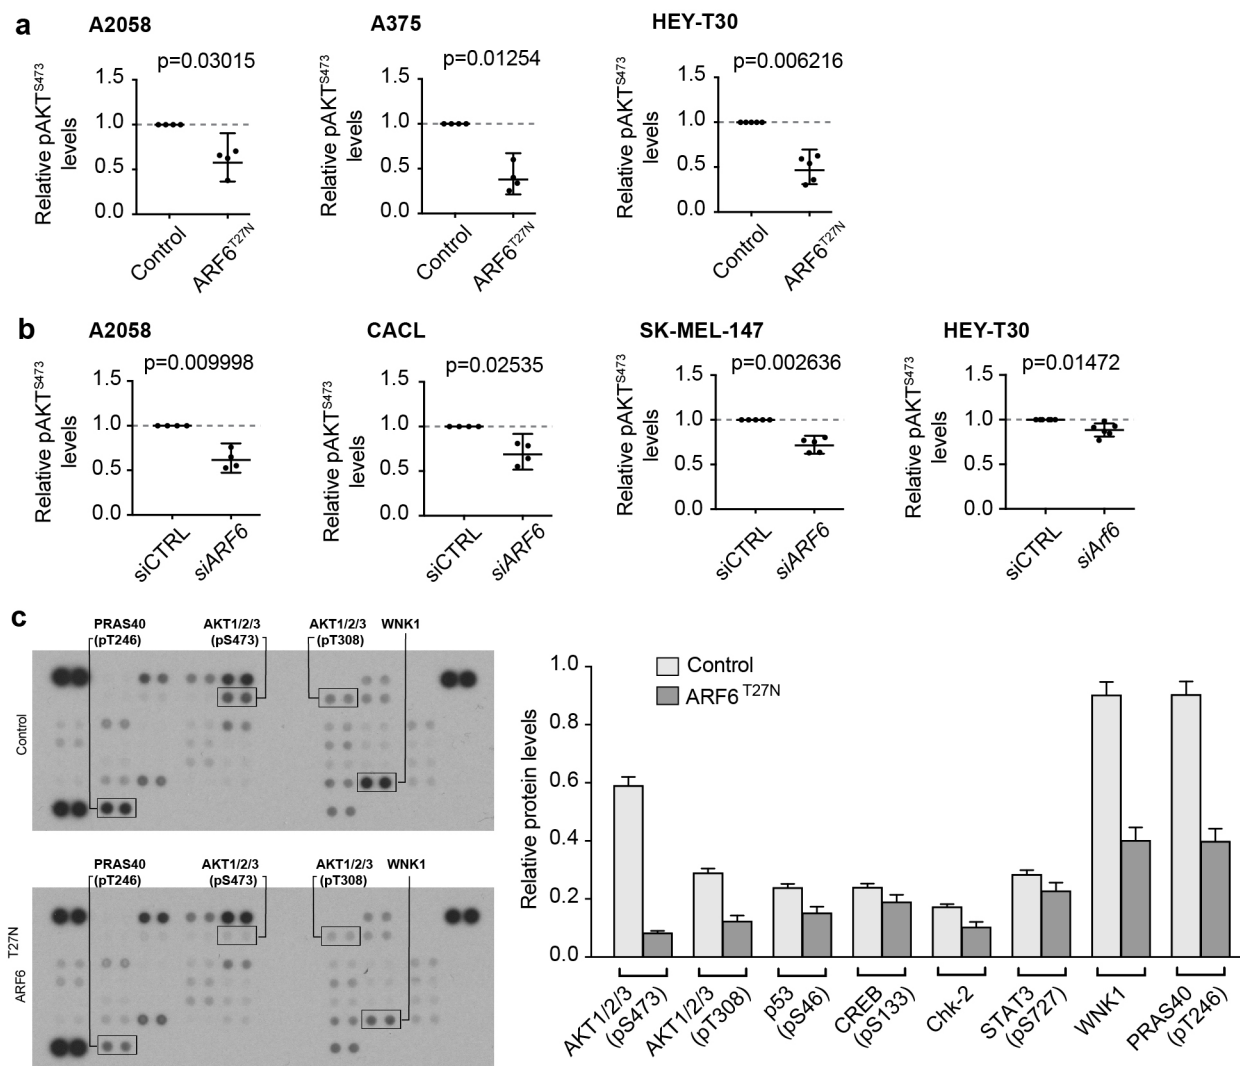

**Figure S6. ARF6-GDP inhibits PI3K-AKT activation and is necessary for AKT activation.**

(a-b) Quantification of western blots shown in Figure 5c-d. Reproducible reduction in pAKT by Myc-ARF6<sup>T27N</sup> over expression in A375 cells (n=4), A2058 cells (n=4), and HEY-T30 cells (n=5). Reduced pAKT with siRNA knockdown of *ARF6* in SK-MEL-147 (n=5), A2058 (n=4), and CACL (n=4) and HEY-T30 (n=6). Graphs show individual data points normalized to control along with geometric means, 95% CI, ratio paired t test. (c) Phosphokinase array images (left) and quantification of signal by densitometry (right, histogram), n=1. Expression of ARF6<sup>T27N</sup> in A2058 cells preferentially reduced pAKT and the AKT substrate PRAS40 over most other proteins in the array.
