# Supplementary material
Source: PubMed Central journal article supplement (PMC7197377)
Supplement: NIHMS1527225-supplement-7.pdf [file NIHMS1527225-supplement-7.pdf]

**a Overall Survival, All Stages**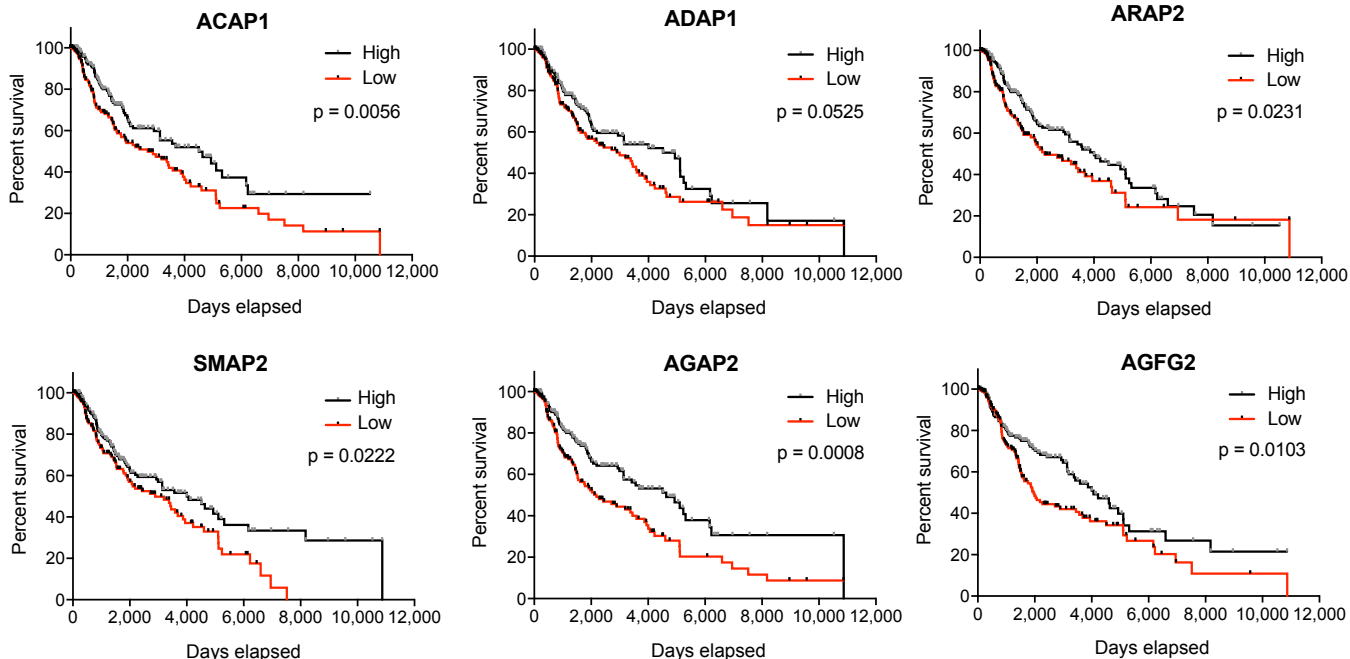**b Overall Survival, Stage III**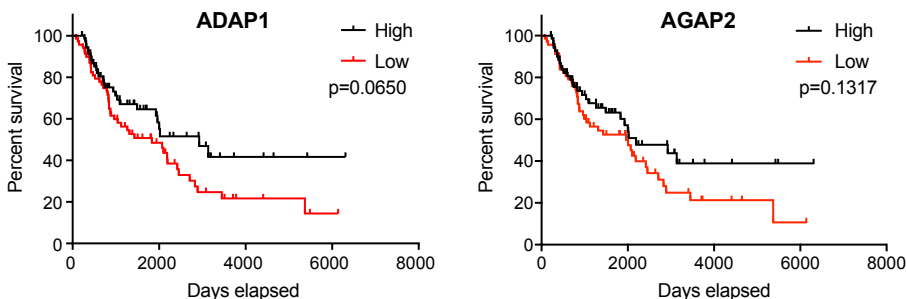

**Figure S7. Low expression of ARF GAP genes correlates with reduced overall survival.** (a) Individual gene plots of four ARF6 GAPs (*ACAP1*, *ADAP1*, *ARAP2*, *SMAP2*), an ARF1/ARF5 GAP (*AGAP2*) and one predicted ARF GAP (*AGFG2*). n = 439 patients. (b) Individual gene plots in Stage III specific cohort, n=142 patients. Log-rank (Mantel-Cox) test.
