# Supplementary material
Source: PubMed Central journal article supplement (PMC7197377)
Supplement: NIHMS1527225-supplement-8.pdf [file NIHMS1527225-supplement-8.pdf]

Supplementary Table 1. ARF6 pathway and related genes

|                |                                                                                                                                                                                            |
|----------------|--------------------------------------------------------------------------------------------------------------------------------------------------------------------------------------------|
| ARFs           | <i>ARF1, ARF3, ARF4, ARF5, ARF6</i>                                                                                                                                                        |
| GEFs           | <i>CYTH1, CYTH2, CYTH3, CYTH4, IQSEC1/GEP100, IQSEC2, IQSEC3, GBF1, ARFGEF1, ARFGEF2, PSD, FBXO8, PREB</i>                                                                                 |
| GAPs           | <i>ACAP1, ACAP2, ACAP3, PDCD61P, ARAP1, ARAP2, ARAP3, ARFGAP1, ARFGAP2, ARFGAP3, ASAP1, ASAP2, ASAP3, GIT1, GIT2, SMAP1, SMAP2, ADAP1, ADAP2, AGAP1, AGAP2, AGAP3, AGAP4, AGFG1, AGFG2</i> |
| ARF6 effectors | <i>MAPL8IP3/JIP3, SPAG9/JIP4, VEZT, EXOC5, PIP5K1B</i>                                                                                                                                     |
| SLIT-ROBO      | <i>SLIT1, SLIT2, SLIT3, ROBO1, ROBO2, ROBO3, ROBO4, SRGAP2, ENAH</i>                                                                                                                       |
| Netrin         | <i>NTN1, NTN3, NTN4, NTN5, DCC, UNC5B</i>                                                                                                                                                  |
